# Supplementary material for: Efficient additive-free FAPbI3 perovskite solar cells achieved by promoting homogeneity
Source: Royal Society of Chemistry journal article supplement (doi:10.1039/d3tc04591a), 2024-01-01
Supplement: d3tc04591a1.pdf [file d3tc04591a1.pdf]

Supplementary Information

**Efficient Additive-free FAPbI<sub>3</sub> Perovskite Solar Cells Achieved by  
Promoting Homogeneity**

*Fanxiu Feng<sup>1</sup>, Yan Guan<sup>2</sup>, Fangzhou Liu<sup>1</sup>, Cuncun Wu<sup>1</sup>, Huhu Su<sup>1</sup>, Biao Wang<sup>1</sup>, Xian  
Zhang<sup>1</sup>, Yuchao Liang<sup>1</sup>, Shaogeng Cai<sup>1</sup>, Yangyang Zhang<sup>\*1</sup>, Lixin Xiao<sup>\*3</sup>, Shijian  
Zheng<sup>\*1</sup>*

<sup>1</sup> Tianjin Key Laboratory of Materials Laminating Fabrication and Interface Control  
Technology, School of Materials Science and Engineering, Hebei University of  
Technology, Tianjin 300130, China

<sup>2</sup> College of Chemistry and Molecular Engineering, Peking University, Beijing 100871,  
P. R. China

<sup>3</sup> State Key Laboratory for Macroscopic Physics and Department of Physics, Peking  
University, Beijing 100871, P. R. China

**AUTHOR INFORMATION**

**Corresponding Authors**

[yyzhang@hebut.edu.cn](mailto:yyzhang@hebut.edu.cn)

[lxxiao@pku.edu.cn](mailto:lxxiao@pku.edu.cn)

[sjzheng@hebut.edu.cn](mailto:sjzheng@hebut.edu.cn)

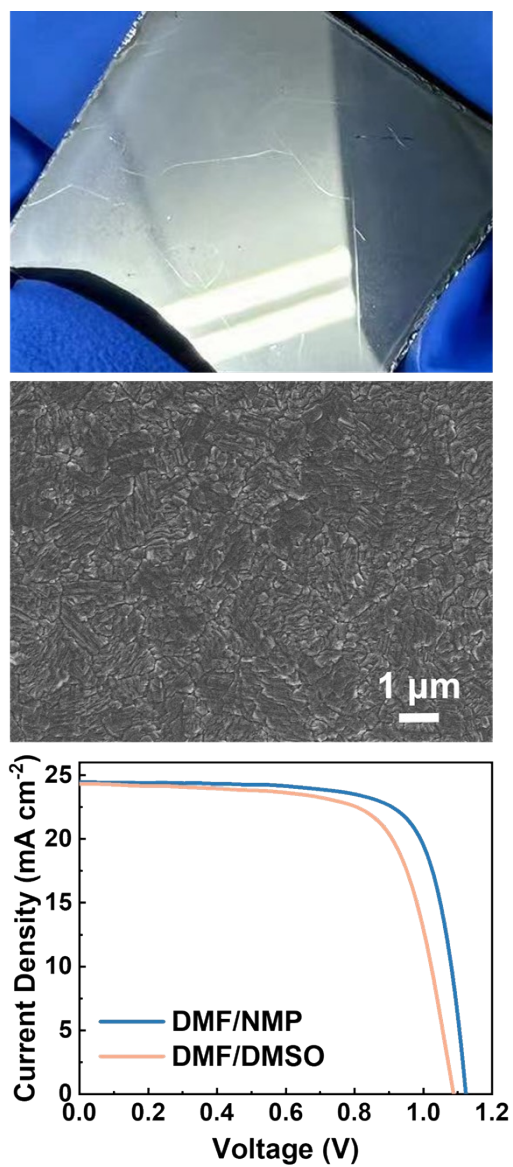

**Figure S1.** Photograph and SEM image of the perovskite films prepared by LPA using a DMF–DMSO cosolvent.  $J$ – $V$  characteristics of PSCs using different solvent system.

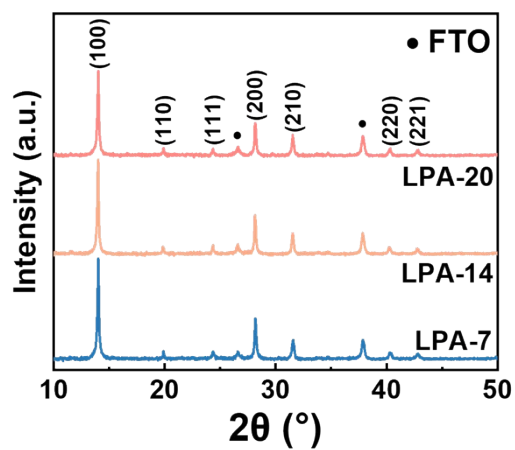

**Figure S2.** XRD patterns of three different perovskite films.

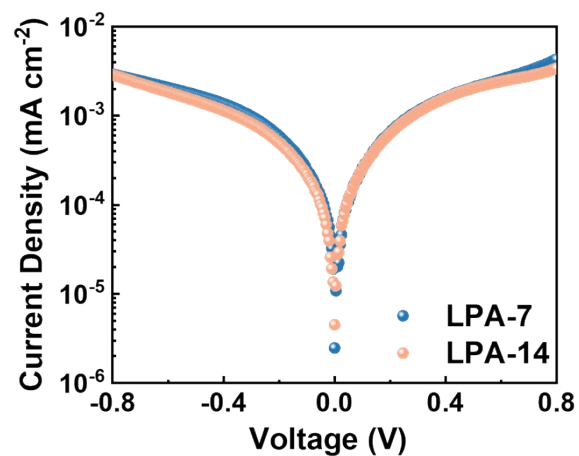

**Figure S3.** Dark  $J$ - $V$  curves for PSCs fabricated with LPA-7 and LPA-14 films.

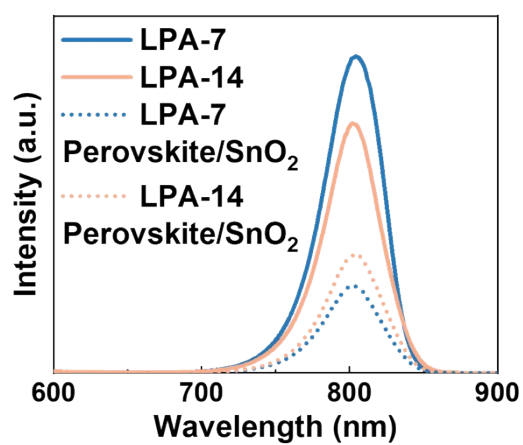

**Figure S4.** PL spectrum of the bare perovskite films and perovskite/SnO<sub>2</sub> films.

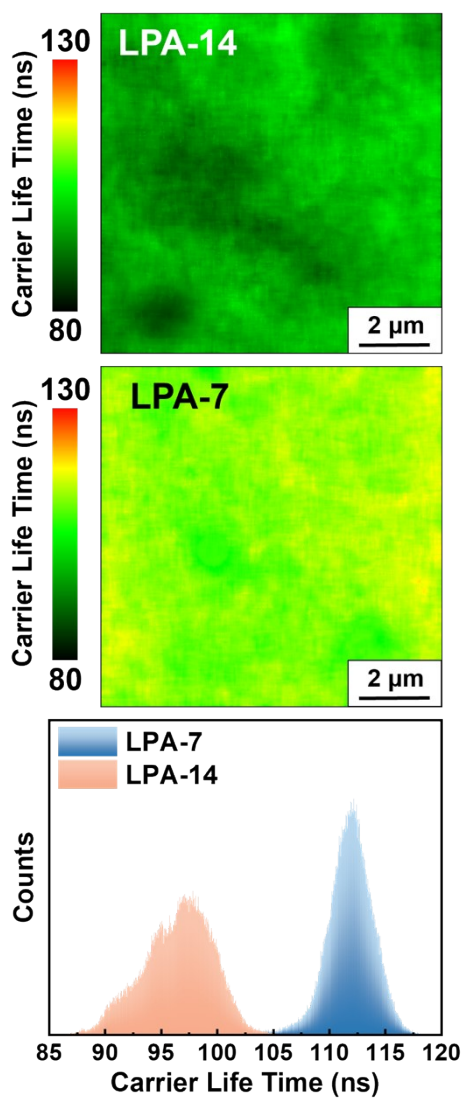

**Figure S5.** PL mapping images (carrier lifetime) of buried interface of LPA-14 and LPA-7 films, as well as the corresponding carrier lifetime distribution.

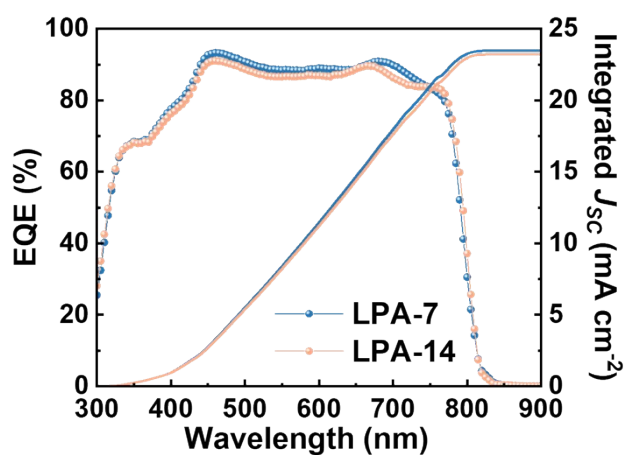

**Figure S6.** EQE spectrum and integrated current density for PSCs fabricated with LPA-7 and LPA-14 films.

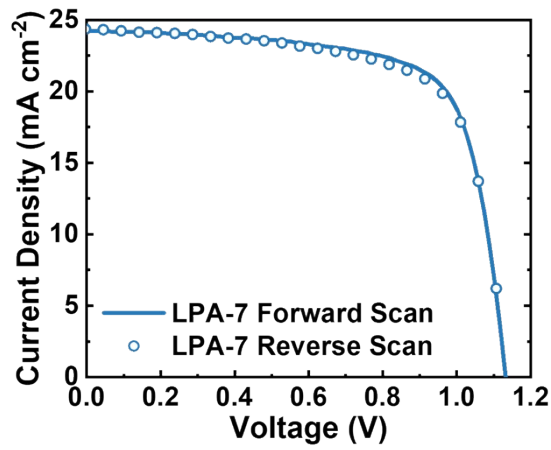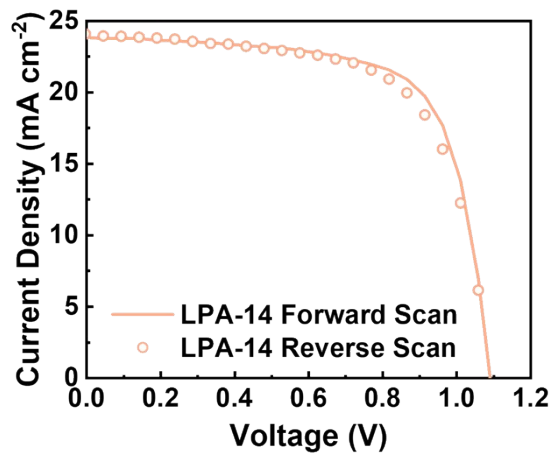

**Figure S7.**  $J$ - $V$  curves of PSCs fabricated with LPA-7 and LPA-14 films measured in forward and reverse scans.

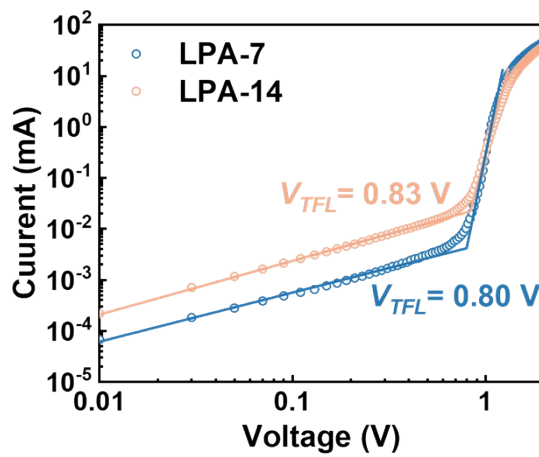

**Figure S8.** SCLC measurements of hole-only devices based on LPA-14 and LPA-7 films.

**Table S1.** RMS roughness of LPA-7, LPA-14 and LPA-20 samples.

| Sample | RMS (nm) |
|--------|----------|
| LPA-7  | 13.57    |
| LPA-14 | 32.74    |
| LPA-20 | 42.56    |

**Table S2.** Previously report photovoltaic parameters of compositionally pure FAPbI<sub>3</sub> PSCs.

| $V_{OC}$ (V)  | $J_{SC}$ (mA/cm <sup>2</sup> ) | FF (%)        | PCE (%) | Year | Reference                      |
|---------------|--------------------------------|---------------|---------|------|--------------------------------|
| 0.94          | 23.3                           | 65            | 14.2    | 2014 | Eperon et al. <sup>1</sup>     |
| 0.991         | 20.94                          | 69            | 14.32   | 2014 | Lee et al. <sup>2</sup>        |
| 1.11          | 21.43                          | 70            | 16.59   | 2015 | Wozny et al. <sup>3</sup>      |
| 1.048         | 21.84                          | 73.6          | 16.84   | 2016 | Aguiar et al. <sup>4</sup>     |
| 0.951         | 24.1                           | 67.7          | 15.5    | 2017 | Fu et al. <sup>5</sup>         |
| 1.048         | 24.23                          | 64.6          | 16.41   | 2018 | Lee et al. <sup>6</sup>        |
| 1.011         | 23.63                          | 63.5          | 15.16   | 2019 | Yang et al. <sup>7</sup>       |
| 1.027         | 24.84                          | 77.08         | 19.66   | 2019 | Kim et al. <sup>8</sup>        |
| 1.04          | 23.00                          | 69            | 16.55   | 2020 | Lyu & Park <sup>9</sup>        |
| 0.99          | 23.28                          | 74            | 17.1    | 2020 | Akin et al. <sup>10</sup>      |
| 1.04          | 24.8                           | 74.6          | 19.3    | 2020 | Yadavalli et al. <sup>11</sup> |
| 1.08          | 22.13                          | 72.8          | 17.39   | 2021 | Zhang et al. <sup>12</sup>     |
| 1.074         | 24.90                          | 75.4          | 20.19   | 2022 | Lin et al. <sup>13</sup>       |
| Not available | Not available                  | Not available | 21.6    | 2022 | Du et al. <sup>14</sup>        |
| 1.131         | 24.58                          | 76.0          | 21.1    | 2023 | This work                      |

**Table S3.** Fitted values of different electronic parameters from dark Nyquist plots of LPA-7 and LPA-14 devices.

| Device | $R_s$ ( $\Omega$ ) | $R_{ct}$ ( $\Omega$ ) | $C_1$ (F)              | $R_{rec}$ ( $\Omega$ ) | $CPE_1$ (F)            |
|--------|--------------------|-----------------------|------------------------|------------------------|------------------------|
| LPA-7  | 0.916              | 2573                  | $1.098 \times 10^{-8}$ | $1.269 \times 10^{20}$ | $8.220 \times 10^{-7}$ |
| LPA-14 | 2.804              | 3797                  | $1.283 \times 10^{-8}$ | $9.239 \times 10^{19}$ | $5.593 \times 10^{-7}$ |

## Reference

- 1 G. E. Eperon, S. D. Stranks, C. Menelaou, M. B. Johnston, L. M. Herz and H. J. Snaith, *Energy Environ. Sci.*, 2014, **7**, 982-988.
- 2 L.-W. Lee, D.-J. Seol, A.-N. Cho and N.-G. Park, *Adv. Mater.*, 2014, **26**, 4991-4998.
- 3 S. Wozny, M. Yang, A. M. Nardes, C. C. Mercado, S. Ferrere, M. O. Reese, W. Zhou and K. Zhu, *Chem. Mater.*, 2015, **27**, 4814-4820.
- 4 J. A. Aguiar, S. Wozny, T. G. Holesinger, T. Aoki, M. K. Patel, M. Yang, J. J. Berry, M. Al-Jassim, W. Zhou and K. Zhu, *Energy Environ. Sci.*, 2016, **9**, 2372-2382.
- 5 Y. Fu, T. Wu, J. Wang, J. Zhai, M. J. Shearer, Y. Zhao, R. J. Hamers, E. Kan, K. Deng, X.-Y. Zhu and S. Jin, *Nano Lett.*, 2017, **17**, 4405-4414.
- 6 J.-W. Lee, Z. Dai, T.-H. Han, C. Choi, S.-Y. Chang, S.-J. Lee, N. D. Marco, H. Zhao, P. Sun, Y. Huang and Y. Yang, *Nat. Commun.*, 2018, **9**, 3021.
- 7 G. Yang, H. Zhang, G. Li and G. Fang, *Nano Energy*, 2019, **63**, 103835.
- 8 M. Kim, G.-H. Kim, T. K. Lee, I. W. Choi, H. W. Choi, Y. Jo, Y. J. Yoon, J. W. Kim, J. Lee, D. Huh, H. Lee, S. K. Kwak, J. Y. Kim and D. S. Kim, *Joule*, 2019, **3**, 2179-2192.
- 9 M. Lyu and N.-G. Park, *Sol. RRL*, 2020, **4**, 2000331.
- 10 S. Akin, E. Akman and S. Sonmezoglu, *Adv. Funct. Mater.*, 2020, **30**, 202002964.
- 11 S. K. Yadavalli, Z. Dai, M. Hu, Q. Dong, W. Li, Y. Zhou, R. Zia and N. P. Padture, *Acta Mater.*, 2020, **193**, 10-18.
- 12 Y. Zhang, Y. Li, L. Zhang, H. Hu, Z. Tang, B. Xu and N.-G. Park, *Adv. Energy Mater.*, 2021, **11**, 2102538.
- 13 D. Lin, Y. Gao, T. Zhang, Z. Zhan, N. Pang, Z. Wu, K. Chen, T. Shi, Z. Pan, P. Liu and W. Xie, *Adv. Funct. Mater.*, 2022, **32**, 2208392.
- 14 T. Du, T. J. Macdonald, R. X. Yang, M. Li, Z. Jiang, L. Mohan, W. Xu, Z. Su, X. Gao, R. Whiteley, C.-T. Lin, G. Min, S. A. Haque, J. R. Durrant, K. A. Persson, M. A. McLachlan and J. Briscoe, *Adv. Mater.*, 2022, **34**, 2107850.
